# Supplementary material for: Molecular Detection of Microsporidia in Rabbits (Oryctolagus cuniculus) in Tenerife, Canary Islands, Spain
Source: MDPI journal article supplement (doi:10.3390/biology11121796), 2022-12-10
Supplement: s1 [file s1]

**Table S1.** Data of the rabbit samples analyzed in this study.

| <b>Sample ID</b> | <b>Location</b>            | <b>Management</b> | <b>Sex</b> | <b>Data</b> |
|------------------|----------------------------|-------------------|------------|-------------|
| MicC1            | Granadilla de Abona        | Industrial farm   | -          | 2015/10/20  |
| MicC17           | Granadilla de Abona        | Industrial farm   | -          | 2015/10/20  |
| MicC21           | Granadilla de Abona        | Industrial farm   | -          | 2015/10/20  |
| MicC23           | Granadilla de Abona        | Industrial farm   | -          | 2015/10/20  |
| MicC27           | La Orotava                 | Environmental     | -          | 6月-17       |
| MicC28           | La Orotava                 | Environmental     | -          | 6月-17       |
| MicC29           | La Orotava                 | Environmental     | -          | 6月-17       |
| MicC30           | La Orotava                 | Environmental     | -          | 6月-17       |
| MicC32           | Granadilla de Abona        | Industrial farm   | Male       | 2015/10/20  |
| MicC36           | Granadilla de Abona        | Industrial farm   | Male       | 2015/10/20  |
| MicC40           | Granadilla de Abona        | Industrial farm   | Female     | 2015/10/20  |
| MicC41           | Granadilla de Abona        | Industrial farm   | Female     | 2015/10/20  |
| MicC43           | Granadilla de Abona        | Industrial farm   | Female     | 2015/10/20  |
| MicC44           | Granadilla de Abona        | Industrial farm   | Female     | 2015/10/20  |
| MicC46           | Granadilla de Abona        | Industrial farm   | Female     | 2015/10/20  |
| MicC48           | Tegueste                   | Family farm       | -          | 2015/10/20  |
| MicC49           | Tegueste                   | Family farm       | -          | 2015/10/20  |
| MicC51           | Tegueste                   | Family farm       | -          | 2015/10/20  |
| MicC52           | Tegueste                   | Family farm       | -          | 2015/10/20  |
| MicC54           | Arafo                      | Hunted            | Male       | 2015/10/20  |
| MicC55           | Arafo                      | Hunted            | Female     | 2015/10/20  |
| MicC57           | Arafo                      | Hunted            | Male       | 2015/10/20  |
| MicC59           | Arafo                      | Hunted            | -          | 2015/10/20  |
| MicC60           | La Orotava                 | Environmental     | Female     | 2015/10/26  |
| MicC61           | La Orotava                 | Environmental     | -          | 2015/10/27  |
| MicC62           | La Orotava                 | Environmental     | -          | 2015/10/27  |
| MicC64           | Güímar                     | Hunted            | -          | 2015/11/4   |
| MicC66           | El Sauzal                  | Found dead        | Female     | 2015/11/16  |
| MicC68           | Granadilla de Abona        | Hunted            | Male       | 2015/12/1   |
| MicC69           | Granadilla de Abona        | Hunted            | Female     | 2015/12/1   |
| MicC70           | Granadilla de Abona        | Hunted            | Female     | 2015/12/1   |
| MicC71           | El Sauzal                  | Hunted            | -          | 2015/12/3   |
| MicC72           | El Sauzal                  | Hunted            | Female     | 2015/12/3   |
| MicC73           | Tegueste                   | Found dead        | -          | 2016/1/29   |
| MicC75           | El Sauzal                  | Hunted            | -          | 2016/2/23   |
| MicC76           | El Sauzal                  | Hunted            | -          | 2016/2/23   |
| MicC77           | El Sauzal                  | Hunted            | -          | 2016/2/23   |
| MicC78           | San Cristóbal de La Laguna | Hunted            | -          | 2016/3/24   |
| MicC80           | San Cristóbal de La Laguna | Hunted            | Male       | 2016/3/24   |
| MicC85           | La Matanza de Acentejo     | Family farm       | -          | 2017/2/20   |
| MicC86           | La Matanza de Acentejo     | Family farm       | -          | 2017/2/20   |
| MicC90           | La Matanza de Acentejo     | Family farm       | -          | 2017/2/20   |
| MicC92           | La Matanza de Acentejo     | Family farm       | -          | 2017/2/20   |
| MicC95           | La Matanza de Acentejo     | Family farm       | -          | 2017/2/20   |
| MicC100          | El Sauzal                  | Found dead        | -          | 2017/5/16   |
| MicC101          | El Sauzal                  | Found dead        | Female     | 2017/5/15   |
| MicC105          | La Orotava                 | Hunted            | Male       | 2017/5/25   |
| MicC109          | La Orotava                 | Hunted            | Male       | 2017/6/21   |
| MicC110          | La Orotava                 | Hunted            | Female     | 2017/6/21   |
| MicC111          | San Cristóbal de La Laguna | Found dead        | -          | 2017/9/16   |
